# Supplementary material for: Delivery of Oligonucleotides Using a Self-Degradable Lipid-Like Material
Source: PubMed Central journal article supplement (PMC8070490; doi:10.3390/pharmaceutics13040544), 2021-04-13
Supplement: pharmaceutics-13-00544-s001.pdf [file pharmaceutics-13-00544-s001.pdf]

# Supplementary Material: Delivery of Oligonucleotides Using a Self-Degradable Lipid-Like Material

Hiroki Tanaka, Nae Takata, Yu Sakurai, Tokuyuki Yoshida, Takao Inoue, Shinya Tamagawa, Yuta Nakai, Kota Tange, Hiroki Yoshioka, Masatoshi Maeki, Manabu Tokeshi and Hidetaka Akita

**Table S1.** Detailed list of supplier's information of the reagents.

| Reagent                                                                                      | Manufacturer             | Product number                |
|----------------------------------------------------------------------------------------------|--------------------------|-------------------------------|
| ssPalmO-Phe                                                                                  | NOF CORPORATION          | COATSOME <sup>®</sup> SS-OP   |
| ssPalmO-P4C2                                                                                 | NOF CORPORATION          | COATSOME <sup>®</sup> SS-OC   |
| ssPalmE-P4C2                                                                                 | NOF CORPORATION          | COATSOME <sup>®</sup> SS-EC   |
| Dioleoyl-sn-glycero-pshophatidyl choline (DOPC)                                              | NOF CORPORATION          | COATSOME <sup>®</sup> MC-8181 |
| Distearoyl-sn-glycero-pshophatidyl choline (DSPC)                                            | NOF CORPORATION          | COATSOME <sup>®</sup> MC-8080 |
| 1-(Monomethoxy polyethyleneglycol2000)2,3-dimyristoylglycerol (DMG-PEG2000)                  | NOF CORPORATION          | SUNBRIGHT <sup>®</sup> GM-020 |
| Phosphate buffered saline                                                                    | NACALAI TESQUE           | 11482-15                      |
| DL-Malic acid                                                                                | NACALAI TESQUE           | 21029-55                      |
| Citric acid, anhydrous                                                                       | NACALAI TESQUE           | 09109-85                      |
| Tris(hydroxymethyl)aminomethane                                                              | NACALAI TESQUE           | 35406-75                      |
| Sodium chloride                                                                              | NACALAI TESQUE           | 31320-05                      |
| Sodium hydroxide                                                                             | NACALAI TESQUE           | 06338-75                      |
| Ethanol 99.5%                                                                                | NACALAI TESQUE           | 14712-05                      |
| Ultrapure <sup>™</sup> distilled water                                                       | Thermo Fisher Scientific | 10977-023                     |
| Quant-IT <sup>™</sup> RiboGreen <sup>™</sup> RNA assay kit                                   | Thermo Fisher Scientific | R11490                        |
| Quant-IT <sup>™</sup> OliGreen <sup>™</sup> ssDNA assay kit                                  | Thermo Fisher Scientific | O11492                        |
| Cholesterol                                                                                  | SIGMA                    | C3045-5G                      |
| TNS                                                                                          | SIGMA                    | T9792-250MG                   |
| Amicon Ultra-4-100K                                                                          | Merck                    | UFC810096                     |
| Amicon Ultra-15-100K                                                                         | Merck                    | UFC910096                     |
| RNAlater Stabilization Solution                                                              | QIAGEN                   | 76104                         |
| RNeasy Mini Kit                                                                              | QIAGEN                   | 74104                         |
| BCA protein Assay Kit                                                                        | TAKARA                   | T9300A                        |
| One Step TB Green <sup>®</sup> Prime-Script <sup>™</sup> PLUS RT-PCR Kit (Perfect Real Time) | TAKARA                   | PR096A                        |
| Otsuka normal Saline                                                                         | Otsuka Pharmaceutical    | 0815                          |
| Hydrogen chloride                                                                            | Wako                     | 080-01066                     |
| Heparin sodium 5,000 Units/ 5mL                                                              | MOCHIDA                  | 224122458                     |
| BIOPHENTM FVII Kit                                                                           | Hyphen Biomed            | 221304                        |

COATSOME and SUNBRIGHT are registered trademarks of NOF CORPORATION in Japan and other countries.

**Table S2.** Sequences of antisense oligonucleotides and primers.

| Name                 | Sequence              |
|----------------------|-----------------------|
| ASOap                | GCattggatTCA          |
| ASOgr                | GTCtctttaccTGG        |
| Gapdh forward primer | gtgtgaacggattggccgt   |
| Gapdh reverse primer | gacaagctcccattctcgg   |
| ApoB forward primer  | ccaagagagtgacatggcgta |
| ApoB reverse primer  | tggaggccactttttggtatc |
| Nr3c1 forward primer | actgtccagcatgccgctat  |
| Nr3c1 reverse primer | gcagtgcttgcgaattcc    |

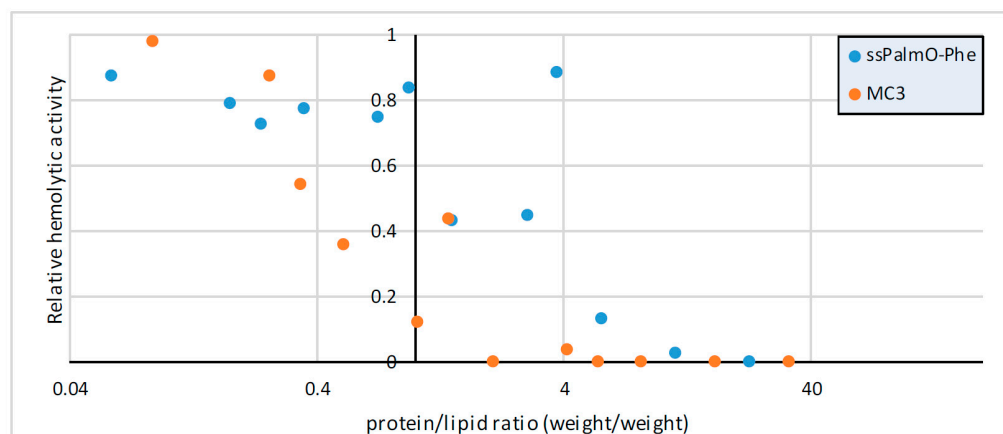**Figure S1.** Scattered plot of relative protein amount-relative hemolysis.

LNPs containing ssPalmO-Phe or DLin-MC3-DMA (MC3) were prepared by the method described in the main text. The lipid composition was ssPalmO-Phe or MC3/DSPC/cholesterol/ DMG-PEG2000 = 50/10/38.5/1.5. Hemolytic activity was assessed by changing the total lipid concentration from 1.56  $\mu\text{M}$  to 400  $\mu\text{M}$  at different amounts of serum protein (20–120  $\mu\text{g}/\text{mL}$ ). Individual data in Figure 7 were then plotted. Relative protein amount against lipids (protein/lipid ratio) was calculated from the molecular weight of the lipids. The hemolytic activity was normalized by the values obtained for serum-free samples. Since the lipid concentration of 1.56  $\mu\text{M}$  did not show significant hemolytic activity, even in the absence of proteins, the concentration was omitted from the analysis.

The relative hemolytic activity gradually decreased as the protein/lipid ratio increased. The relative hemolytic activity of the MC3 decrease at smaller protein/lipid ratio than ssPalmO-Phe. From this result, the serum protein resistance of ssPalmO-Phe was concluded.

**Citation:** Tanaka, H.; Takata, N.; Sakurai, Y.; Yoshida, T.; Inoue, T.; Tamagawa, S.; Nakai, Y.; Tange, K.; Yoshioka, H.; Maeki, M.; et al. Delivery of oligonucleotides using a self-degradable lipid-like material. *Pharmaceutics* **2021**, *12*, x. <https://doi.org/10.3390/10.3390/pharmaceutics13040544>

**Publisher's Note:** MDPI stays neutral with regard to jurisdictional claims in published maps and institutional affiliations.

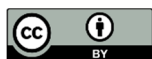

**Copyright:** © 2021 by the authors. Submitted for possible open access publication under the terms and conditions of the Creative Commons Attribution (CC BY) license (<http://creativecommons.org/licenses/by/4.0/>).

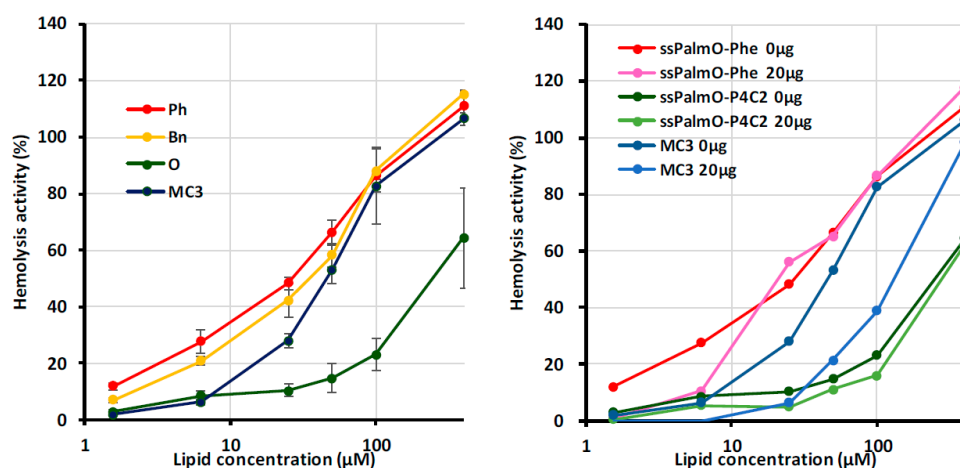

**Figure S2.** Hemolytic activity in the presence of the serum proteins.

LNPs containing the ssPalmO-Phe, ssPalmO-Ben, ssPalmO-P4C2, and DLin-MC3-DMA (MC3) was prepared by the method described in the main text. The lipid composition for the LNP<sub>ssPalm</sub> was ssPalm/cholesterol/DMG-PEG2000 = 70/30/1.5. The lipid composition for the LNP<sub>MC3</sub> was MC3/DSPC/cholesterol/DMG-PEG2000 = 50/10/38.5/1.5. The dose-response curve of the hemolytic activity was assessed by changing the total lipid concentration from 1.56  $\mu\text{M}$  to 400  $\mu\text{M}$ . In the case of a hemolysis assay in the presence of the serum protein, the serum was collected and the protein concentration was quantified by means of a BCA Protein Assay kit (TAKARA) according to the manufacturer's protocol. The serum (20  $\mu\text{g}$  of protein) was added to the red blood cells and the hemolysis assay was conducted.

The hemolytic activity of the optimal lipid composition for siRNA (ssPalm/cholesterol = 70/30) was evaluated. Dose-dependency was clearly observed (**Left figure**). The hemolytic activity of the LNP<sub>ssPalmO-Phe</sub>, LNP<sub>ssPalmO-Ben</sub>, and LNP<sub>MC3</sub> was higher than that of the LNP<sub>ssPalmO-P4C2</sub>. In the range of low lipid concentration (1.56–20  $\mu\text{M}$ ), the LNP<sub>ssPalmO-Phe</sub> and the LNP<sub>ssPalmO-Ben</sub> showed a higher hemolytic activity than the LNP<sub>MC3</sub>. In the presence of 20  $\mu\text{g}$  of serum proteins, the hemolytic activity of the LNP<sub>MC3</sub> was attenuated (**Right figure**). On the other hand, the hemolytic activity of the LNP<sub>ssPalmO-Phe</sub> was not affected by serum proteins. The LNP<sub>ssPalmO-P4C2</sub> also showed resistance against the serum proteins although the original hemolytic activity was lower than that of the LNP<sub>ssPalmO-Phe</sub> and LNP<sub>MC3</sub>. From these observations, it was concluded that the chemical structure of the ssPalm appeared to confer resistance against the serum proteins to the LNP.
